# Supplementary material for: Transmission of pLVPK-like virulence plasmid in Klebsiella pneumoniae mediated by an Incl1 conjugative helper plasmid
Source: PubMed Central journal article supplement — iScience. 2022 May 18;25(6):104428. doi: 10.1016/j.isci.2022.104428 (PMC9160755; doi:10.1016/j.isci.2022.104428), 2022-05-18
Supplement: mmc1.pdf [file mmc1.pdf]

iScience, Volume 25

## Supplemental information

### Transmission of pLVPK-like virulence plasmid in *Klebsiella pneumoniae* mediated by an IncI1 conjugative helper plasmid

Xuemei Yang, Miaomiao Xie, Qi Xu, Lianwei Ye, Chen Yang, Ning Dong, Edward Wai-Chi Chan, Rong Zhang, and Sheng Chen

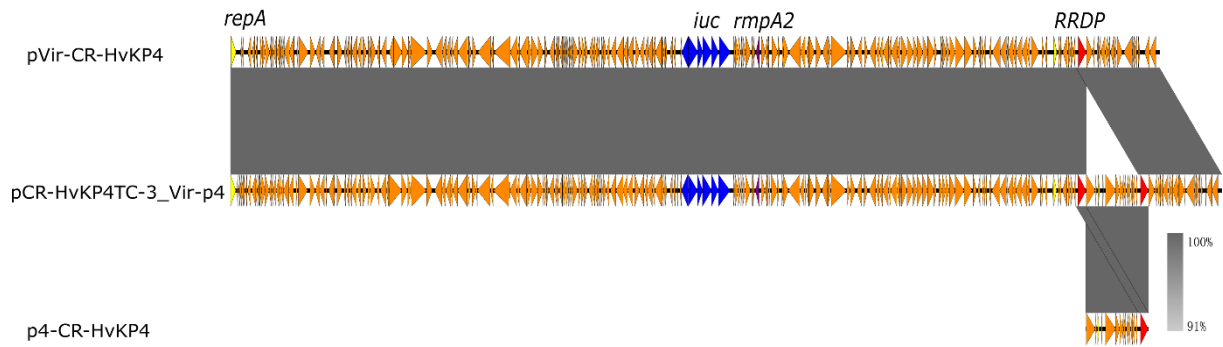

**Figure S1** Alignment of plasmid pCR-HvKP4TC-3\_Vir-p4 with plasmids pVir-CR-HvKP4 and p4-CR-HvKP4 by easyfig. Referred to Figure 2a.

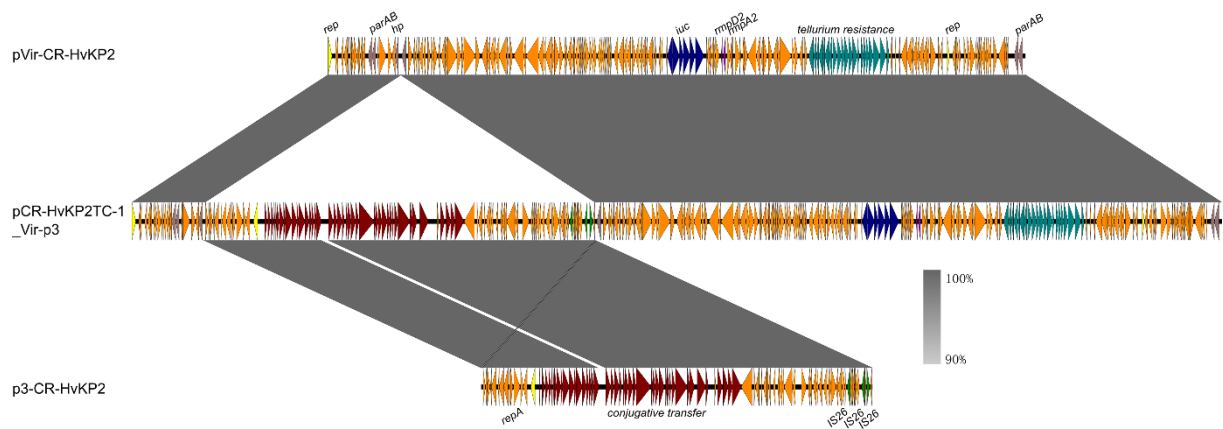

**Figure S2** Alignment of plasmid pCR-HvKP2TC-1\_Vir-p3 with plasmid pVir-CR-HvKP2 and p3-CR-HvKP2 by easyfig. Referred to Figure 3a.

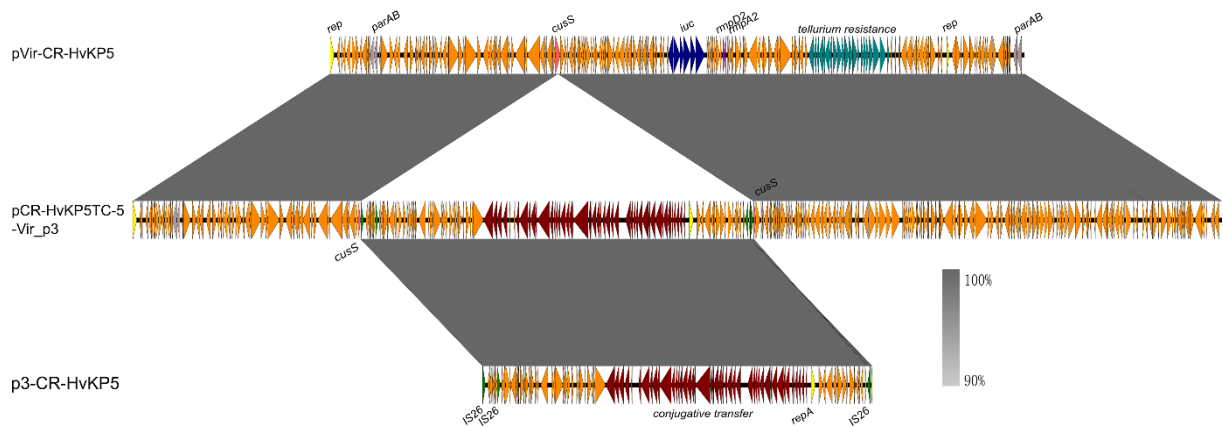

**Figure S3** Alignment of plasmid pCR-HvKP5TC-5\_Vir-p3 with plasmid pVir-CR-HvKP5 and p3-CR-HvKP5 by easyfig. Referred to Figure 4a.



**Figure S5. Alignment of the plasmid p3-CR-HvKP1 with other related plasmids retrieved from the GenBank database and recovered from strains in the CR-HvKP strains originated hospital in China. Referred to Table 2.** The alignment was performed using BLAST Ring Image Generator (BRIG). Other information of these strains was shown in Supplementary Table S2.

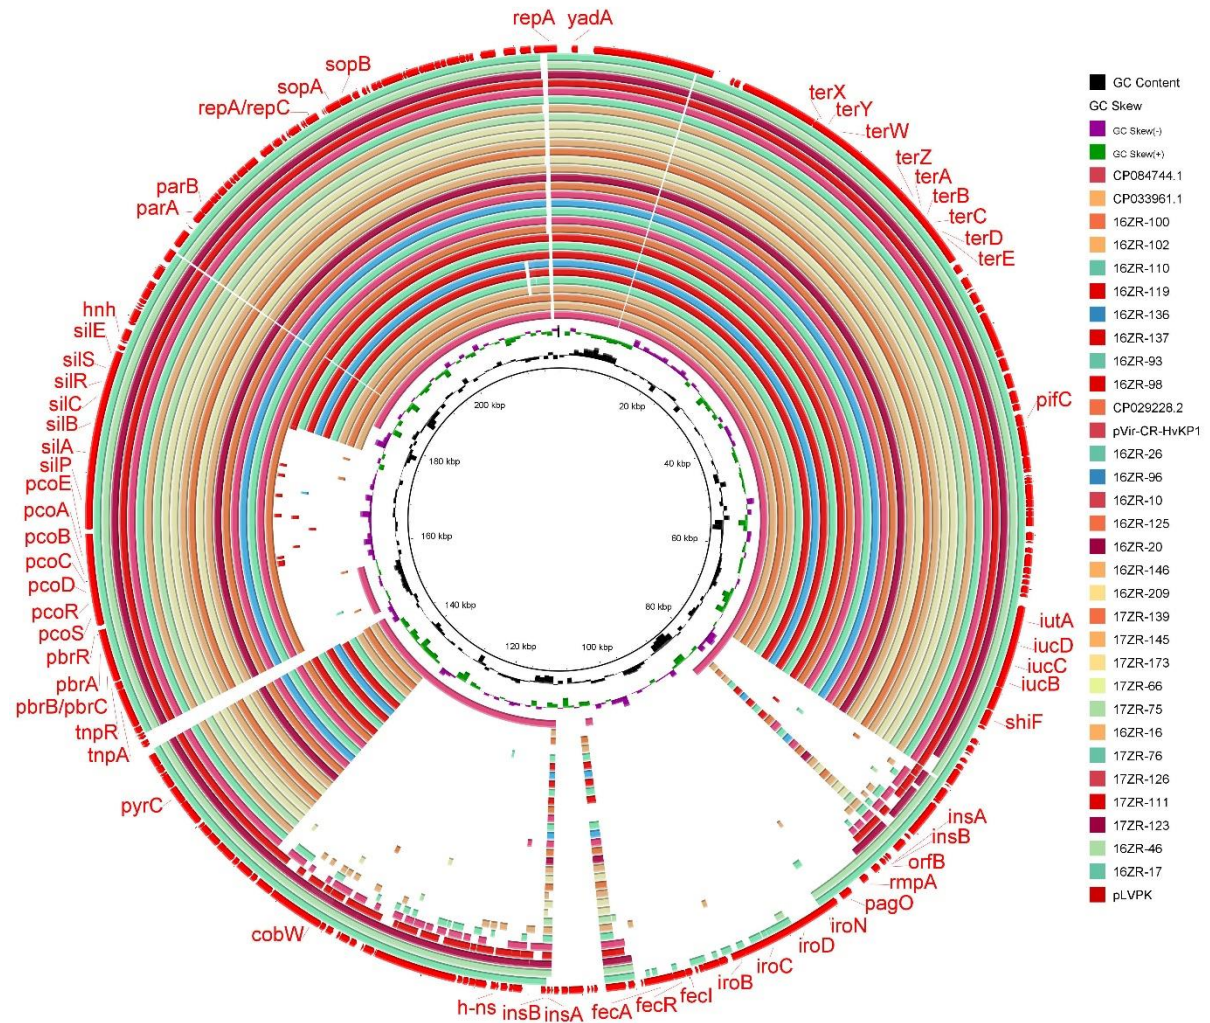

**Figure S6. Alignment of the plasmid pVir-CR-HvKP1 with other virulence plasmids from bacterial strains that harbored p3-CR-HvKP1-like plasmid from the GenBank database and the CR-HvKP strains originated hospital in China. Referred to Table 2.** The alignment was performed using BLAST Ring Image Generator (BRIG).

**Table S1. The primer sequences and the expected sizes of products to detect the fusion plasmids. Referred to STAR Methods.**

| Fusion plasmids      | Upstream integration site                            |               | Downstream integration site                           |               |
|----------------------|------------------------------------------------------|---------------|-------------------------------------------------------|---------------|
|                      | Primers (5'-3')                                      | Expected size | Primers (5'-3')                                       | Expected size |
| pCR-HvKP1TC-1_Vir-p4 | F1: GCACAGGCAAGAGAAGCAAT<br>R1: GCTTTAACTCTCCAAGTCCC | 3515 bp       | F2: ACGCGATCTGCTTACAGGTG<br>R2: CGAGATGGGTGAGGTTATCC  | 3440 bp       |
| pCR-HvKP2TC-1_Vir-p3 | F3: GCAGGGCATATAGCTTCTTC<br>R3: TGCCTTCATCATTGTGGCCA | 1419 bp       | F4: GCCTGATGATCACCACCGAA<br>R4: TGAGGACATTGCGTCCCTC   | 2737 bp       |
| pCR-HvKP5TC-5_Vir-p3 | F5: GGATGCATAGCAAACCTTCC<br>R6: CGTACGTAGCGGGTAAAATC | 1759 bp       | F6: GGAATACGATCTCGATACC<br>R6: GCGTGATATTGCGTTCTTCG   | 2884 bp       |
| pCR-HvKP3TC-2_Vir-p3 | F8: GGATGTCGGAAGCTGACTAT<br>R8: GGGACATTTTACGGATGCGT | 3081 bp       | F8: CGGGGTGGCTTTGTTGAATA<br>R8: ACACCACTTTGTCCGGATGCT | 2671 bp       |
